# Supplementary material for: Ternary semiconductor ZnxAg1−xS nanocomposites for efficient photocatalytic degradation of organophosphorus pesticides
Source: Royal Society of Chemistry journal article supplement (doi:10.1039/c8pp00220g), 2018-09-11
Supplement: c8pp00220g1.pdf [file c8pp00220g1.pdf]

**Electronic Supplementary Information (ESI)**

**Ternary semiconductor  $Zn_xAg_{1-x}S$  nanocomposites for efficient photocatalytic  
degradation of organophosphorus pesticides †**

Dasari Ayodhya\*, Guttena Veerabhadram

Department of Chemistry, Osmania University, Hyderabad-500007, Telanagana state, India

\*Corresponding author mail: [ayodhyadasari@gmail.com](mailto:ayodhyadasari@gmail.com)

Mobile: 91-9010877323

† Electronic Supplementary Information (ESI) available

**Figure S1** The Photocatalytic degradation of (a) MLT, (b) MCP and (c) CPS were traced through UV-visible absorption spectra in the absence of the  $Zn_xAg_{1-x}S$  composite photocatalysts

**Figure S2** The Photocatalytic degradation of (a) MLT, (b) MCP and (c) CPS were traced through UV-visible absorption spectra in the presence of the  $Zn_xAg_{1-x}S$  composite photocatalysts

**Figure S3** Effects of the addition of different scavengers on the photocatalytic degradation of (a) MLT, (b) MCP and (c) CPS over ZnS composite photocatalysts

**Figure S4** Effects of the addition of different scavengers on the photocatalytic degradation of (a) MLT, (b) MCP and (c) CPS over  $Ag_2S$  composite photocatalysts

**Figure S5** Cycling runs in the photocatalytic degradation of (a) MLT, (b) MCP and (c) CPS in the presence of synthesized ZnS composite photocatalysts under UV light irradiation

**Figure S6** Cycling runs in the photocatalytic degradation of (a) MLT, (b) MCP and (c) CPS in the presence of synthesized  $Ag_2S$  composite photocatalysts under UV light irradiation

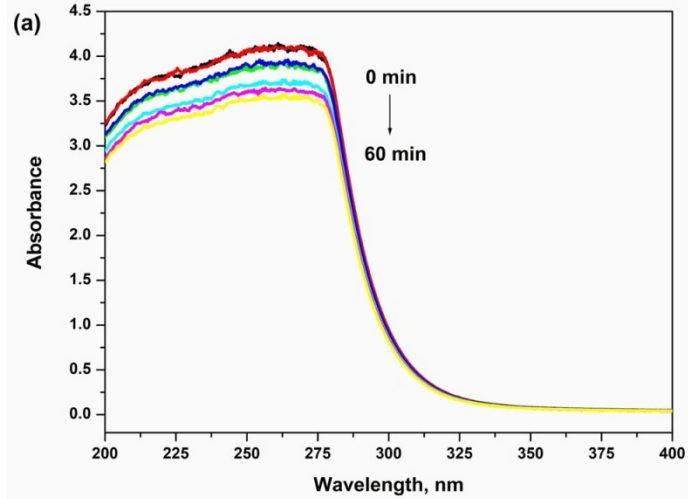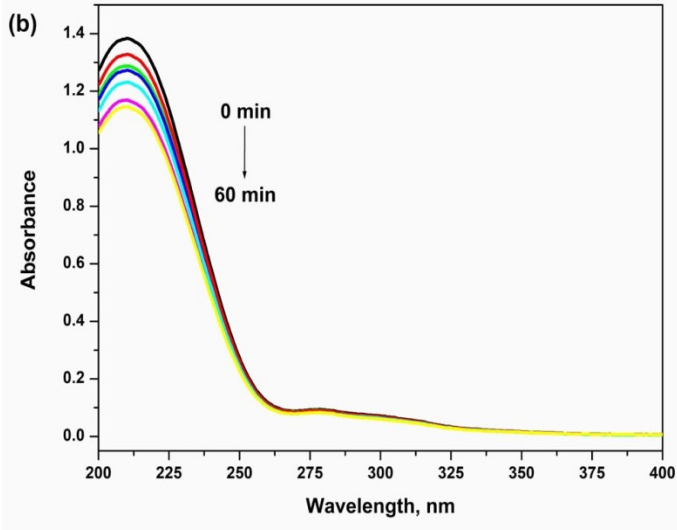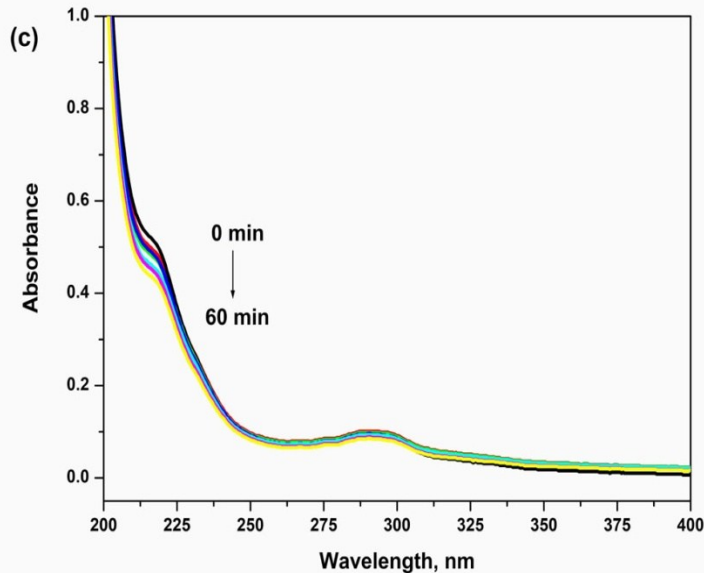

Figure S1

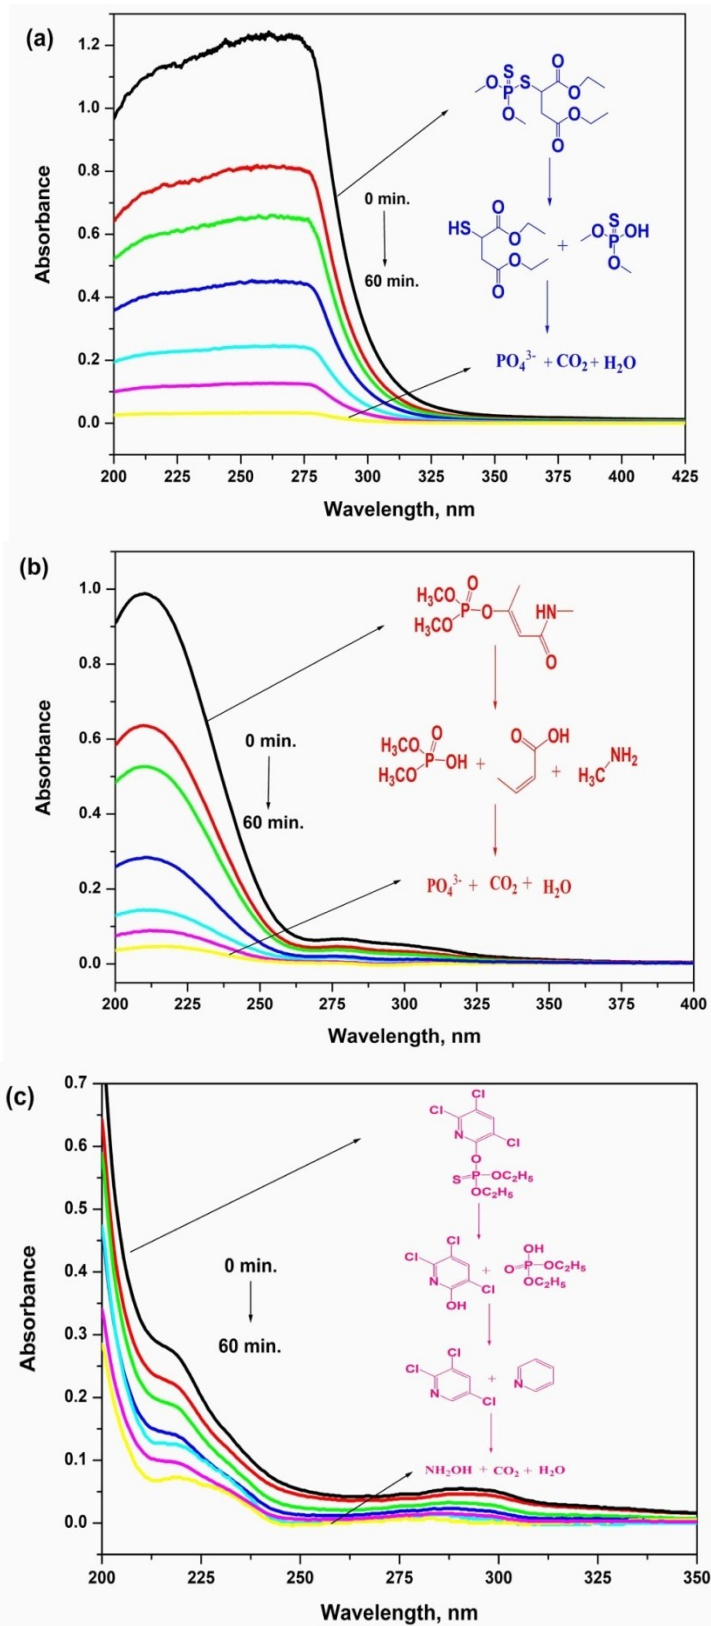

Figure S2

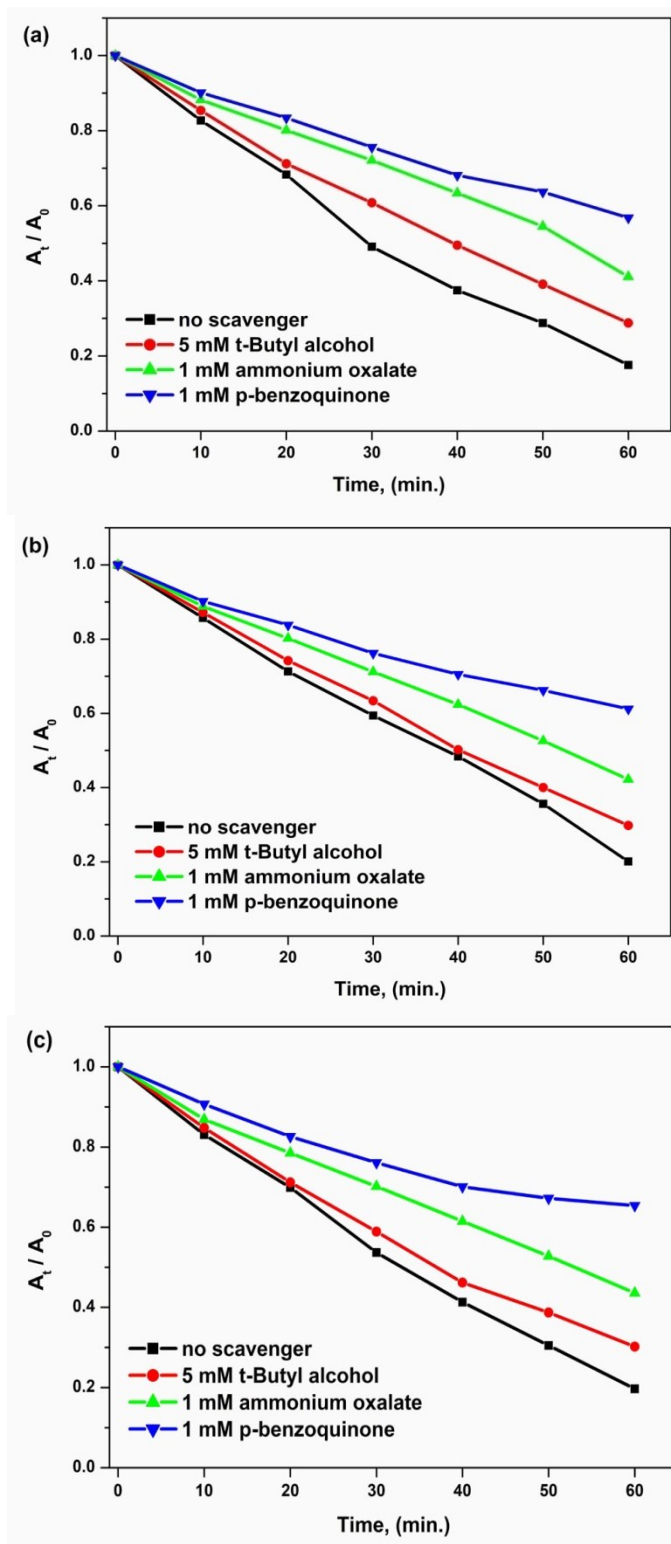

Figure S3

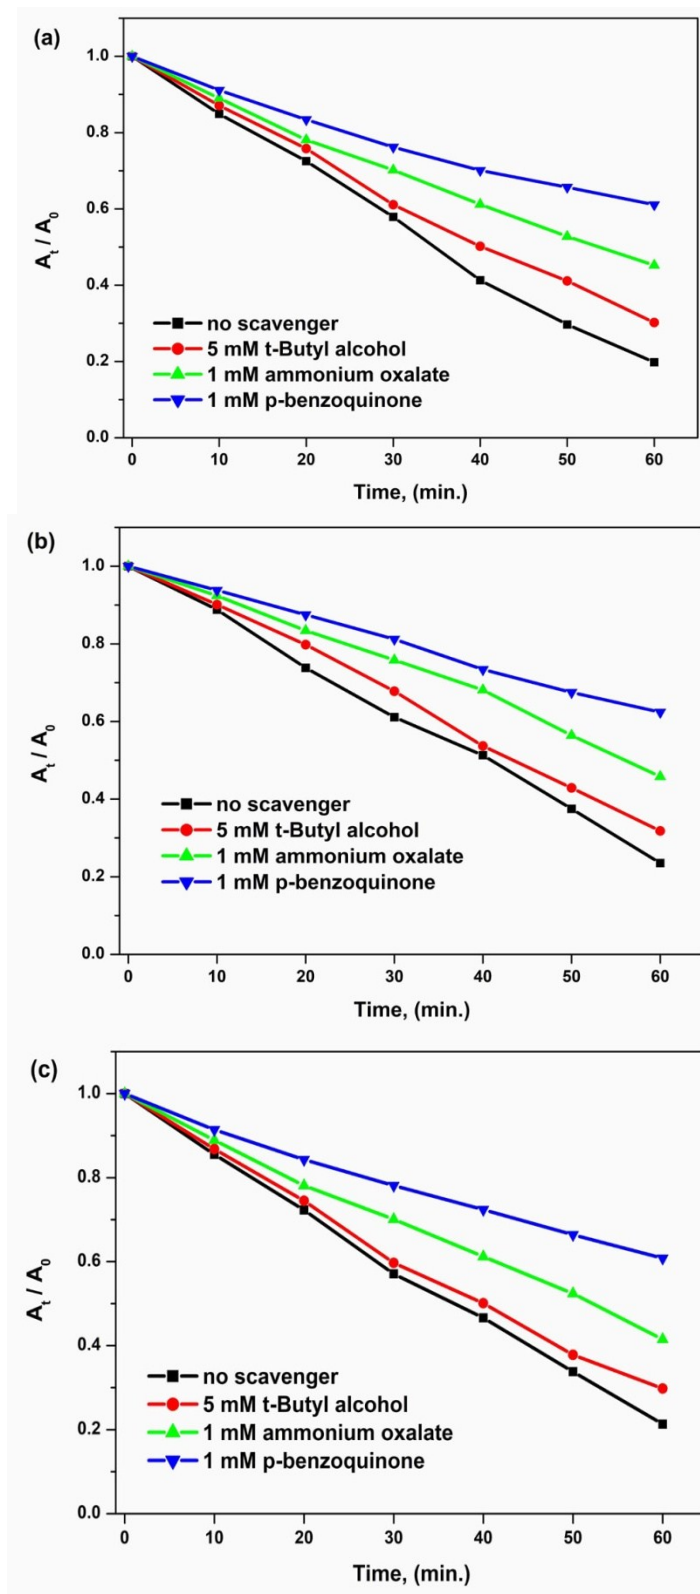

Figure S4

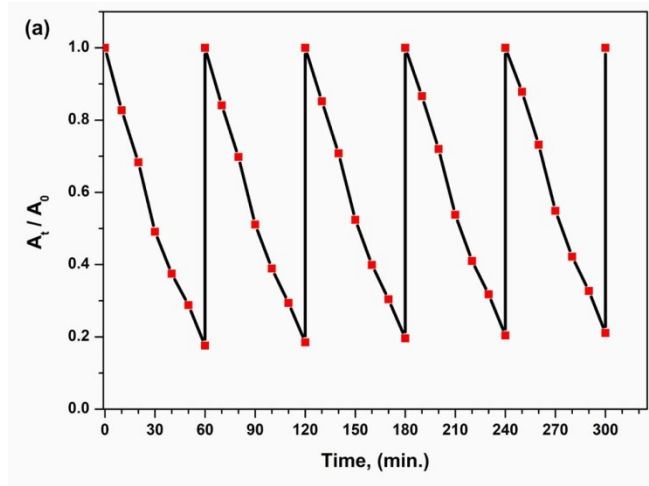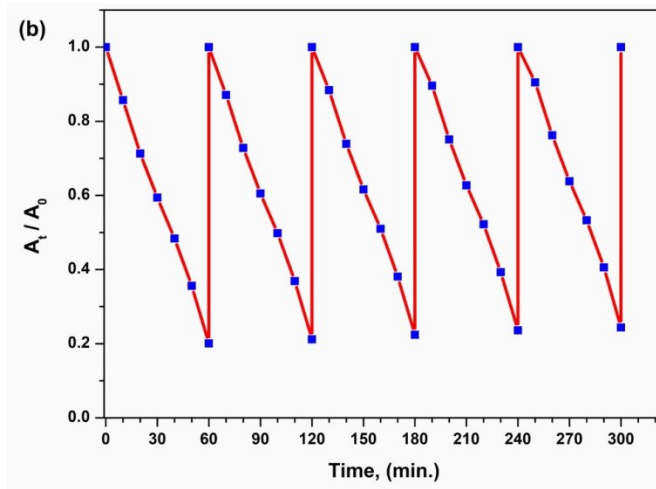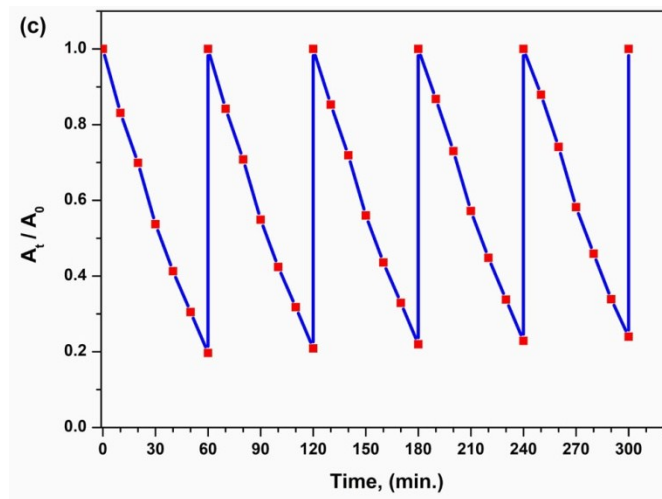

Figure S5

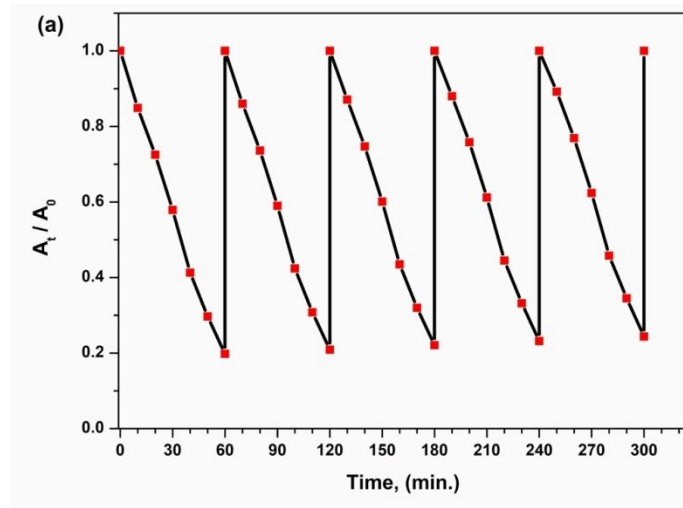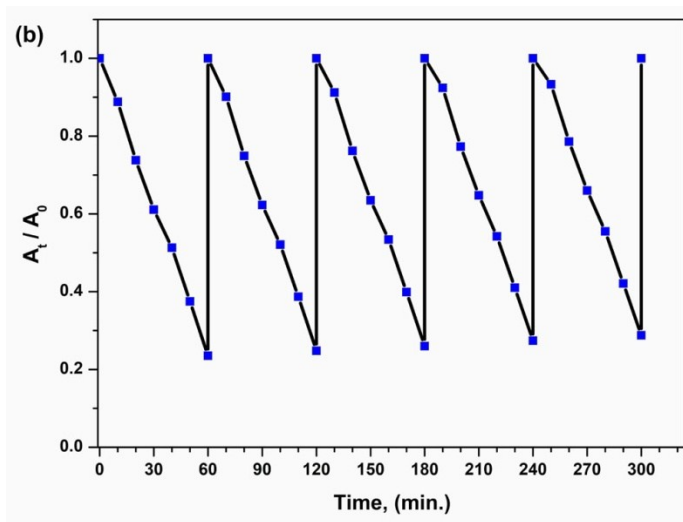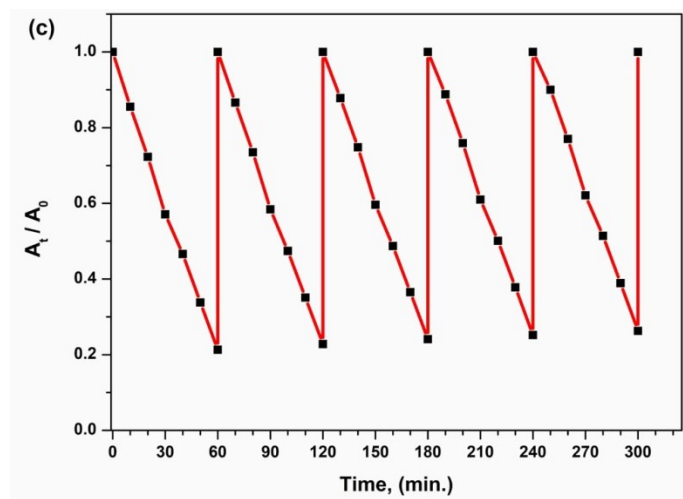

Figure S6
